# Supplementary figures and images for: Substrates with Engineered Step Changes in Rigidity Induce Traction Force Polarity and Durotaxis
Source: Springer Nature journal article supplement (doi:10.1007/s12195-013-0307-6), 2013-10-08

**Supporting Figure 1**

**
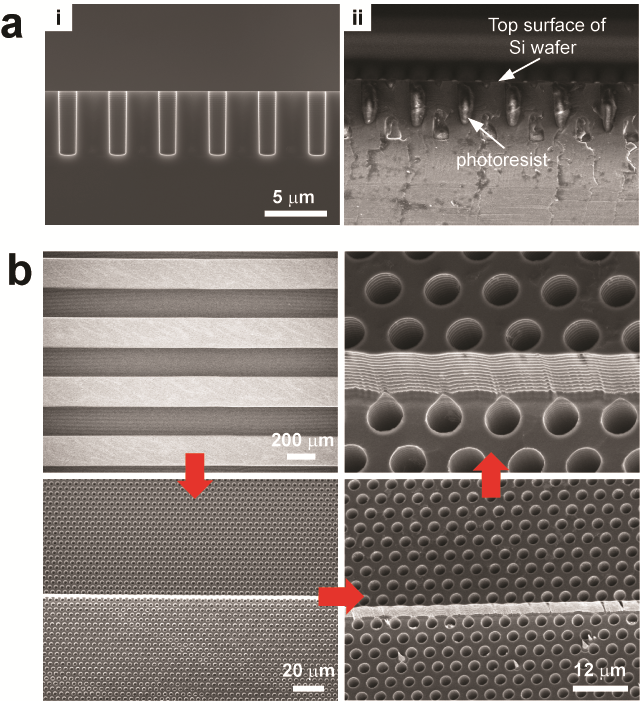
**

Supplement: MOESM1 [file 12195_2013_307_MOESM1_ESM.docx]
